# Supplementary material
Source: HighWire-hosted journal article supplement (http://www.cmaj.ca/highwire/filestream/73099/field_highwire_adjunct_files/3/181712-res-4-at.pdf)
Supplement: 181712-res-4-at.pdf [file 181712-res-4-at.pdf]

**Appendix 4 (as supplied by the authors) : Patient impact (multiplicative scale). Adjusted\* odds ratios (95% CIs) of frequent ER use in Quebec by number of physical conditions, stratified by mental disorder status (No mental disorder, n = 4,638,633; Common mental disorder, n= 598,276; Serious mental disorder, n= 79,923), fiscal year 2014-2015**

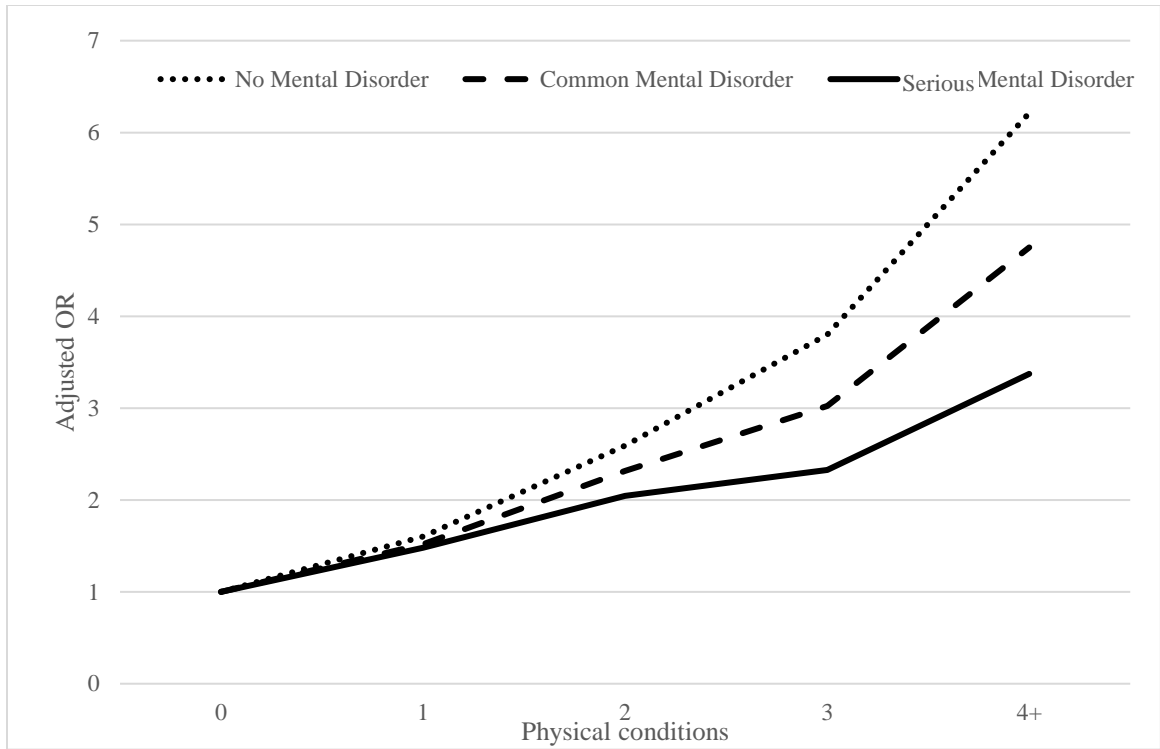

|                                 | 0    | 1                 | 2                 | 3                 | 4+                |
|---------------------------------|------|-------------------|-------------------|-------------------|-------------------|
| <b>No mental disorder</b>       | 1.00 | 1.60 (1.58; 1.62) | 2.59 (2.54; 2.65) | 3.80 (3.69; 3.91) | 6.21 (6.08; 6.35) |
| <b>Common mental disorders</b>  | 1.00 | 1.52 (1.48; 1.56) | 2.32 (2.23; 2.40) | 3.02 (2.89; 3.17) | 4.75 (4.60; 4.90) |
| <b>Serious mental disorders</b> | 1.00 | 1.48 (1.40; 1.57) | 2.04 (1.90; 2.20) | 2.33 (2.14; 2.54) | 3.37 (3.18; 3.57) |

\*Adjusted for age, sex, material deprivation, social deprivation, and rurality. Model includes interaction terms for each combination of physical conditions and mental disorders; 95% Confidence intervals calculated using Wald's method for logistic regression; CI: Confidence interval; OR: odds ratio
